# Supplementary material for: Histone chaperone activity of Arabidopsis thaliana NRP1 is blocked by cytochrome c
Source: PubMed Central journal article supplement — Nucleic Acids Res. 2016 Dec 6;45(4):2150–65. doi: 10.1093/nar/gkw1215 (PMC5389710; doi:10.1093/nar/gkw1215), 2016-12-06

## Supplementary legends

**Table S1.** Dissociation constants ( $K_D$ ) of *A. thaliana* NRP1 interaction with either histones or Cc measured by Surface Plasmon Resonance (SPR).  $K_D$  values were calculated from the fits of SPR curves to the binding models described in Figure S6.

**Figure S1.** Multiple alignment of amino acid sequences of NRP1 (UniProt entry: Q9CA59-1), AtNAP1;1 (UniProt: Q9SZI2-1), AtNAP1;2 (UniProt: Q9ZUP3-1), AtNAP1;3 (UniProt: Q94K07-1) and AtNAP1;4 (UniProt: F4JEI8-1) using Clustal Omega. Sequences are coloured by similarity: fully conserved residue (black), residues with strongly similar properties (light blue) and residues with weakly similar properties (grey).

**Figure S2.** MALDI-TOF MS analyses of H2B, H3 and H4 histones (*X. laevis*), Cc and NRP1 (*A. thaliana*).

**Figure S3. A.** MALDI-TOF MS analyses of the H2A, H2B, H3 and H4 histones (*G. gallus*). **B.** *Left:* SDS-PAGE showing the electrophoretic purity of *A. thaliana* Cc and NRP1 (lanes 2-3), *X. laevis* H2B, H3 and H4 histones (lanes 4-6). *Right:* SDS-PAGE of *G. gallus* H2A-H2B and H3-H4 dimers (lanes 2-3). In both gels, lane 1 indicates protein ladder markers.

**Figure S4.** Far-UV CD spectra of NRP1 (*left*) and *X. laevis* core histones H2B, H3 and H4 (*right*).

**Figure S5.** ITC measurements of interactions of NRP1 with H2B, H3 and H4 isolated core histones, H2A-H2B, H3-H4 and Cc. Thermograms along with the binding isotherms (*top* and *bottom*, respectively) are shown.

**Figure S6.** Analysis of Surface Plasmon Resonance curves. SPR response curves – obtained with 0.1 and 1  $\mu$ M NRP1 analyte and distinct immobilized ligands – are represented by dots. Red lines correspond to a simultaneous, global fit of the two curves to a one-site binding model. Blue lines represent global fits to a multiple-site binding model. Data is representative of a total of 6 injections.

**Figure S7.** Multiple alignment of amino acid sequences of core histones H2A, H2B, H3 and H4 from *X. laevis* (UniProt [respectively]: P06897-1, P02281-1, P02302-1, P62799-1) and *A. thaliana* (UniProt [respectively]: Q8GUH3-1, Q1H5F7-1, B9DGR9-1, P59259-1) using Clustal Omega. Sequences coloured by similarity: fully conserved residue (black), residues with strongly similar properties (light blue) and residues with weakly similar properties (grey).

**Figure S8. A.** Schematic representation of the nucleosome assembly activity of NRP1 by means of plasmid supercoiling assays. **B.** Nucleosome assembly activity by supercoiling assays in presence of isolated NRP1 (lane 3), HeLa core histones (lane 4), Cc (lane 5) or combination of Cc with histones (lane 6) or NRP1 (lane 7). Plasmids previously treated with Topo I. Lane 1 (control) shows supercoiled, untreated DNA plasmid, whereas lane 2 corresponds to DNA plasmid relaxed by Topo I. **C.** MNase assay in presence of isolated HeLa core histones (lane 2),

NRP1 (lane 3), Cc (lane 4) or combination of Cc with histones (lane 5) or NRP1 (lane 6). Plasmid DNA was digested with 30 U/ml MNase. Lane 1 indicates a DNA ladder marker and the size of each band is represented on the left. **D.** 1D  $^1\text{H}$  NMR spectra monitoring Met-88 methyl signal of reduced Cc (13  $\mu\text{M}$ ) in absence (—) or presence of 6.5  $\mu\text{M}$  BSA (—) or 300  $\mu\text{g}$  calf thymus histones (...).

**Figure S9. BiGGER molecular docking of complexes between NRP1 and *A. thaliana* core histones.**

500 solutions of docking for histone:NRP1 complexes. Centres of mass for H2A (green spheres), H2B (purple spheres), H3 (red spheres) and H4 (blue spheres) represented. NRP1 ribbon representations (gold) are shown and arrows indicate the two highest-scoring solutions.

**Figure S10. Differences in line-width ( $\Delta\Delta v_{1/2\text{Binding}}$ ) in  $^{15}\text{N}$  dimension of Cc amide NMR signals upon binding to NRP1.**

$\Delta\Delta v_{1/2\text{Binding}}$  of Cc amide groups were calculated from differences between [ $^1\text{H}$ ,  $^{15}\text{N}$ ] HSQC spectra of free Cc and Cc in Cc:NRP1 complex at a ratio of 1:0.5. Residues exhibiting significant line broadening beyond threshold marked with asterisk. Threshold (dashed line) corresponds to average plus 2-fold the standard deviations ( $\Delta\Delta v_{1/2\text{Binding}} \geq \Delta\Delta v_{1/2\text{Binding}} + 2S_{n-1}$ ).

**Figure S11. Comparison of complexes formed between NRP1 and Cc or core histones.**

**A.** Ribbon representations for two best models, according to overall score for complex between NRP1 and Cc yielded by NMR-restrained BiGGER molecular docking. NRP1 ribbon representation (gold), Cc (blue) and Cc heme group (red) are shown.

**B-E.** Ribbon representations for two best models according to overall score for complexes between NRP1 and histones H2A (B), H2B (C) H3 (D) or H4 (E) obtained by BiGGER molecular docking. NRP1 ribbon representation (gold), H2A (green), H2B (purple), H3 (red) and H4 (dark blue) are shown. NRP1 is shown in the same orientation as in A.

**Table S1**

| <b>Protein complex</b> | <b><math>K_D</math> (<math>\mu\text{M}</math>)</b> |
|------------------------|----------------------------------------------------|
| H2B:NRP1               | 18.5                                               |
| H3:NRP1                | 57.9                                               |
| H4:NRP1                | 28.9                                               |
| H2A-H2B:NRP1           | 0.51                                               |
| H3-H4:NRP1             | 0.74                                               |
| Cc:NRP1                | 12.1                                               |

|          |               |               |                  |                       |
|----------|---------------|---------------|------------------|-----------------------|
| NRP1     | -----MVA      | DKSKKSKIEEK   | GEENLEQIDAELVLS  | 30                    |
| AtNAP1;4 | MSNEENIKSDNKS | GDSSDLPTIP-   | ALDIGAEECDLLAELK | NLT                   |
| AtNAP1;2 | MSND-----     | KDSMNMSDLSTAL | NEDDRAGLVNALK    | NKLQNL                |
| AtNAP1;1 | MSND-----     | KDSFNVSDLTAAL | KDEDDRAGLVNALK   | NKLQNL                |
| AtNAP1;3 | MSND-----     | KDSFNVSDLTSA  | LKDEDDRAGLVNALK  | NKLQNL                |
| NRP1     |               | TEKLOEIQDDLEK | INEKASDEVLEVEQ   | KYNVTRKPVYDKRNEVI     |
| AtNAP1;4 |               | VLFKLDIQVTHDE | LEEKFLAEKSALEAT  | YDNLKPLFAKRYEIV       |
| AtNAP1;2 |               | VEFLREIQNQYDE | MEAKFFERAAL      | EAKYQKLYQPLYTKRYEIV   |
| AtNAP1;1 |               | VDALRDIQSQHDE | LEAKFREERAIL     | EAKYQTLYQPLYVKRYEIV   |
| AtNAP1;3 |               | VEVLEIQGKHDEI | ETKFRERAALEAK    | YQKLYQPLYNKRVEIV      |
| NRP1     |               | -----QSTPG    | FWMTAFLSHPALGDL  | TEEDQKIFKYLNSLEVEDAKD |
| AtNAP1;4 |               | -----AEKEG    | VPNFWLIAMKTNEML  | ANETTERDEAALKYLKDIR   |
| AtNAP1;2 |               | EQGEDKSAEEKG  | VDFWLIALKNEITA   | EETTERDEGALKYLKDIK    |
| AtNAP1;1 |               | DQGEKTAEEKG   | VPSFWLTAALKNND   | VISEEETTERDEGALKYLK   |
| AtNAP1;3 |               | DQGDEKTAEEKG  | VPSFWLTAALKNND   | VISEEETTERDEGALILY    |
| NRP1     |               | FFFTSNPFFEDAK | LTKTFTFLEEGTT--  | KITATPIKWKKEGKGL      |
| AtNAP1;4 |               | FFFDNSLYFKNS  | VLSKTYHVNDE      | DGPVLEKVI             |
| AtNAP1;2 |               | FFFDQNPYFKNT  | VLTTKTYHMIDE     | DEPILEKALGTEIEWY      |
| AtNAP1;1 |               | FFFDTNPYFKNT  | VLTTKSYHMIDE     | DEPLLEKAMGTEIDWY      |
| AtNAP1;3 |               | FFFDQNPYFKNT  | LLTKAYHMIDE      | DEPLLEKAMGTEIDWY      |
| NRP1     |               | -----KRALPE   | SFFTWF           | TDACHKEDAG-----       |
| AtNAP1;4 |               | VNNIPMTKTENC  | SFFNF            | FKPPEIPEIDEVDDY       |
| AtNAP1;2 |               | KNTKPI        | TKTEDCESFFNF     | FSPQVPDDD-----        |
| AtNAP1;1 |               | KNTKPI        | TKLEDCESFFNF     | FSPQVPDED-----        |
| AtNAP1;3 |               | KNAKPI        | TKTEDCESFFNF     | FNPQVPDDD-----        |
| NRP1     |               | DLWSNPLTYFN   | NDADEE-DFDGD     | DGDEE-----            |
| AtNAP1;4 |               | KLIIPHAVSWFT  | GEALVDEDDSD      | DDNDDN-DEKSD-----     |
| AtNAP1;2 |               | KIISHAVSWFT   | GEAVEADDLIED     | DDD-EIDEDEDEDEDEDE    |
| AtNAP1;1 |               | KIIPRAVSWFT   | GEAMEADFEID      | DEEDDIDEDEDEDEDE      |
| AtNAP1;3 |               | KIIPHAVSWFT   | GEALIEGEEFEI     | DNDEDDIDEDEDEDEDE     |
| NRP1     |               | -----         |                  |                       |
| AtNAP1;4 |               | -----         |                  |                       |
| AtNAP1;2 |               | QGKSKKKSSAG   | HKKAGRSQA-       | EGQAGERPPECKQQ        |
| AtNAP1;1 |               | EESKTKKKPSI   | GKKGGRSQI        | VGEGKQDERPPECKQQ      |
| AtNAP1;3 |               | EVSKTKKKPSV   | LHKKGGRPQ        | VTD-DQQGERPPECKQQ     |

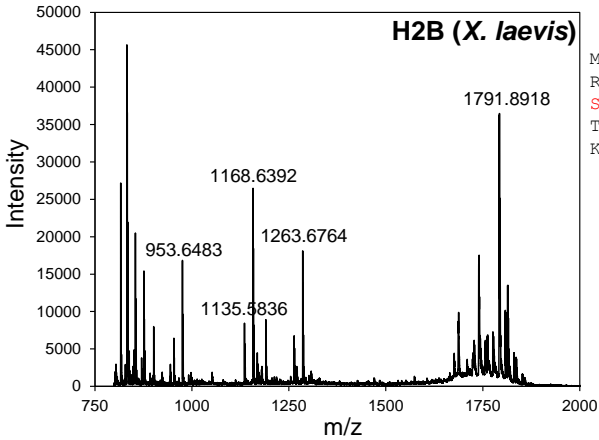

MPEPAKSAPAPKPKGSKKAVTKTKQKKDGKKR  
 RKSRKESYAIYVYKVLKQVHPDTGISSKAM  
 SIMNSFVNDVFERIAGEASRLAHYNKRSTI  
 TSREIQTAVRLLLPGLGELAKHAVSEGTKAVT  
 KYTSAK

| Observed m/z | Peptide         |
|--------------|-----------------|
| 953.6483     | LLLPGLGELAK     |
| 1135.5836    | ESYAIYVYK       |
| 1168.6392    | QVHPDTGISSK     |
| 1263.6764    | KESYAIYVYK      |
| 1791.8918    | AMSIMNSFVNDVFER |

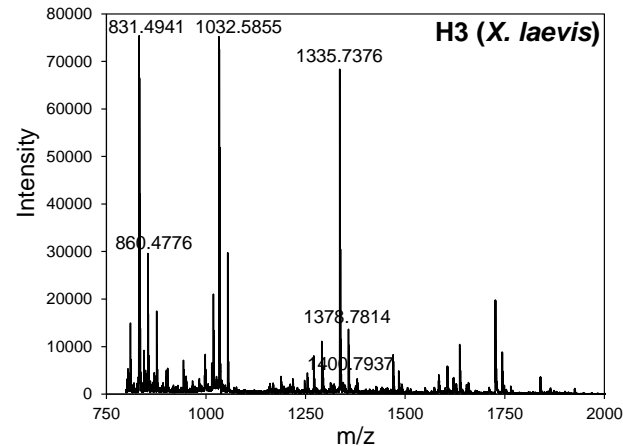

MARTKQARKSTGGKAPRKLQVLTKAAKKC  
 APATGGVKKPHRYRPGTVLREIRRYQKS  
 TELLIRKLPFQRLVREIAQDFKTDLRFQR  
 SAVMALQEASEAYLVLFEDTNLCAIHAK  
 RVTIMPKDIQLARRIRGERA

| Observed m/z | Peptide       |
|--------------|---------------|
| 831.4941     | STELLIR       |
| 860.4776     | RVTIMPK       |
| 1032.5855    | YRPGTVLALR    |
| 1335.7376    | EIAQDFKTDLR   |
| 1378.7814    | CAPATGGVKKPHR |
| 1400.7937    | TIMPKDIQLAR   |

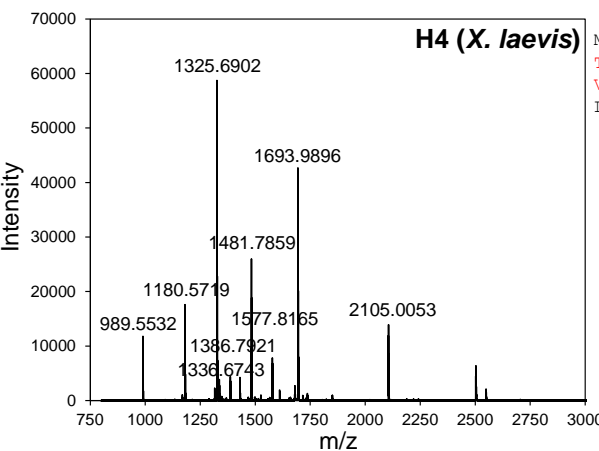

MSGRGKGGKLGKGGAKRHRKVLDRNIQGI  
 TKPAIRRLARRGGVKKRISGLIYEETRGLVK  
 VFLENVIRDAVYTEHAKRKTVTAMDVVYA  
 LKRQGRITLYGFGG

| Observed m/z | Peptide           |
|--------------|-------------------|
| 989.5532     | VFLENVIR          |
| 1180.5719    | ISGLIYEETR        |
| 1325.6902    | DNIQGITKPAIR      |
| 1336.6743    | RISGLIYEETR       |
| 1386.7921    | GVLKVFLENVIR      |
| 1481.7859    | DNIQGITKPAIRR     |
| 1577.8165    | ISGLIYEETRGLVK    |
| 1693.9896    | VLRDNIQGITKPAIR   |
| 2105.0053    | VFLENVIRDAVYTEHAK |

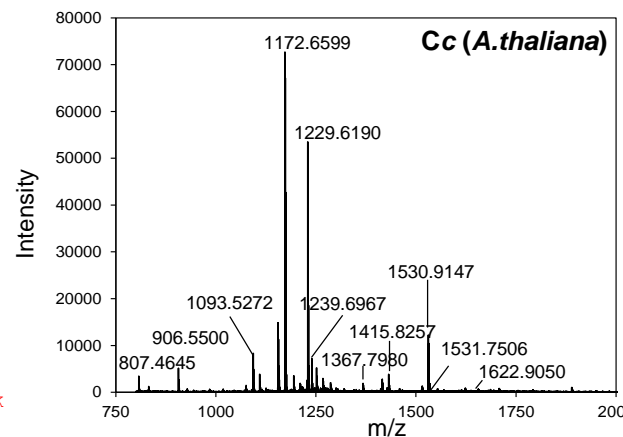

MASFDEAPPGNPKAGEKIFRTKCAQCHT  
 VEKGAGHKQGNLNLGFRQSGTTPGYS  
 YSAANKSMAVNWEETLYDYLLNPKKI  
 PGTKMVFPLGKPKQDRADLIAYLKEGTA

| Observed m/z | Peptide         |
|--------------|-----------------|
| 807.4645     | MVFPGLK         |
| 906.5500     | ADLIAYLK        |
| 1093.5272    | SMAVNWEET       |
| 1172.6599    | QGNLNLGFR       |
| 1229.6190    | ASFDEAPPGNPK    |
| 1239.6967    | TYDYLLNPK       |
| 1367.7980    | TYDYLLNPKK      |
| 1415.8257    | MVFPGLKPKQDR    |
| 1530.9147    | KPQDRADLIAYLK   |
| 1531.7506    | QSGTTPGYSYSAANK |
| 1622.9050    | GAGHKQGNLNLGFR  |

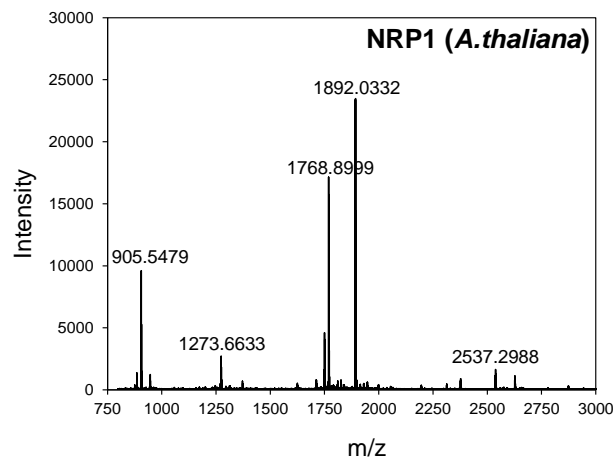

MVADKSKKSKIEKGEENLEQIDAELVLSIEKLEIQDDL  
 EKINEKASDEVLEVEQKYNVIRKPVYDKRNEVIQSIPGFW  
 TAFLSHPALGDLLEEDQKIFKYLNSLEVEDAKDVKSGYSI  
 TFHFTSNPFFEDAKLTKTFTFLEEGTTKITATPIKWKEGK  
 LFNQVNHDDKGNKRALPEESFTFTDAQHKEDAGDEIHD  
 EVADIKEDLWSNPLTYFNNDAADEEDFDGDDGDEEGEEDD  
 DDEEEEDGE

| Observed m/z | Peptide                |
|--------------|------------------------|
| 905.5479     | KPVYDKR                |
| 1273.6633    | TFTFLEEGTTK            |
| 1768.8999    | EDAGDEIHDEVADIK        |
| 1892.0332    | ASDEVLEVEQKYNVIR       |
| 2537.2988    | SGYSITFHFTSNPFFEDAKLTK |

**Fig. S2**

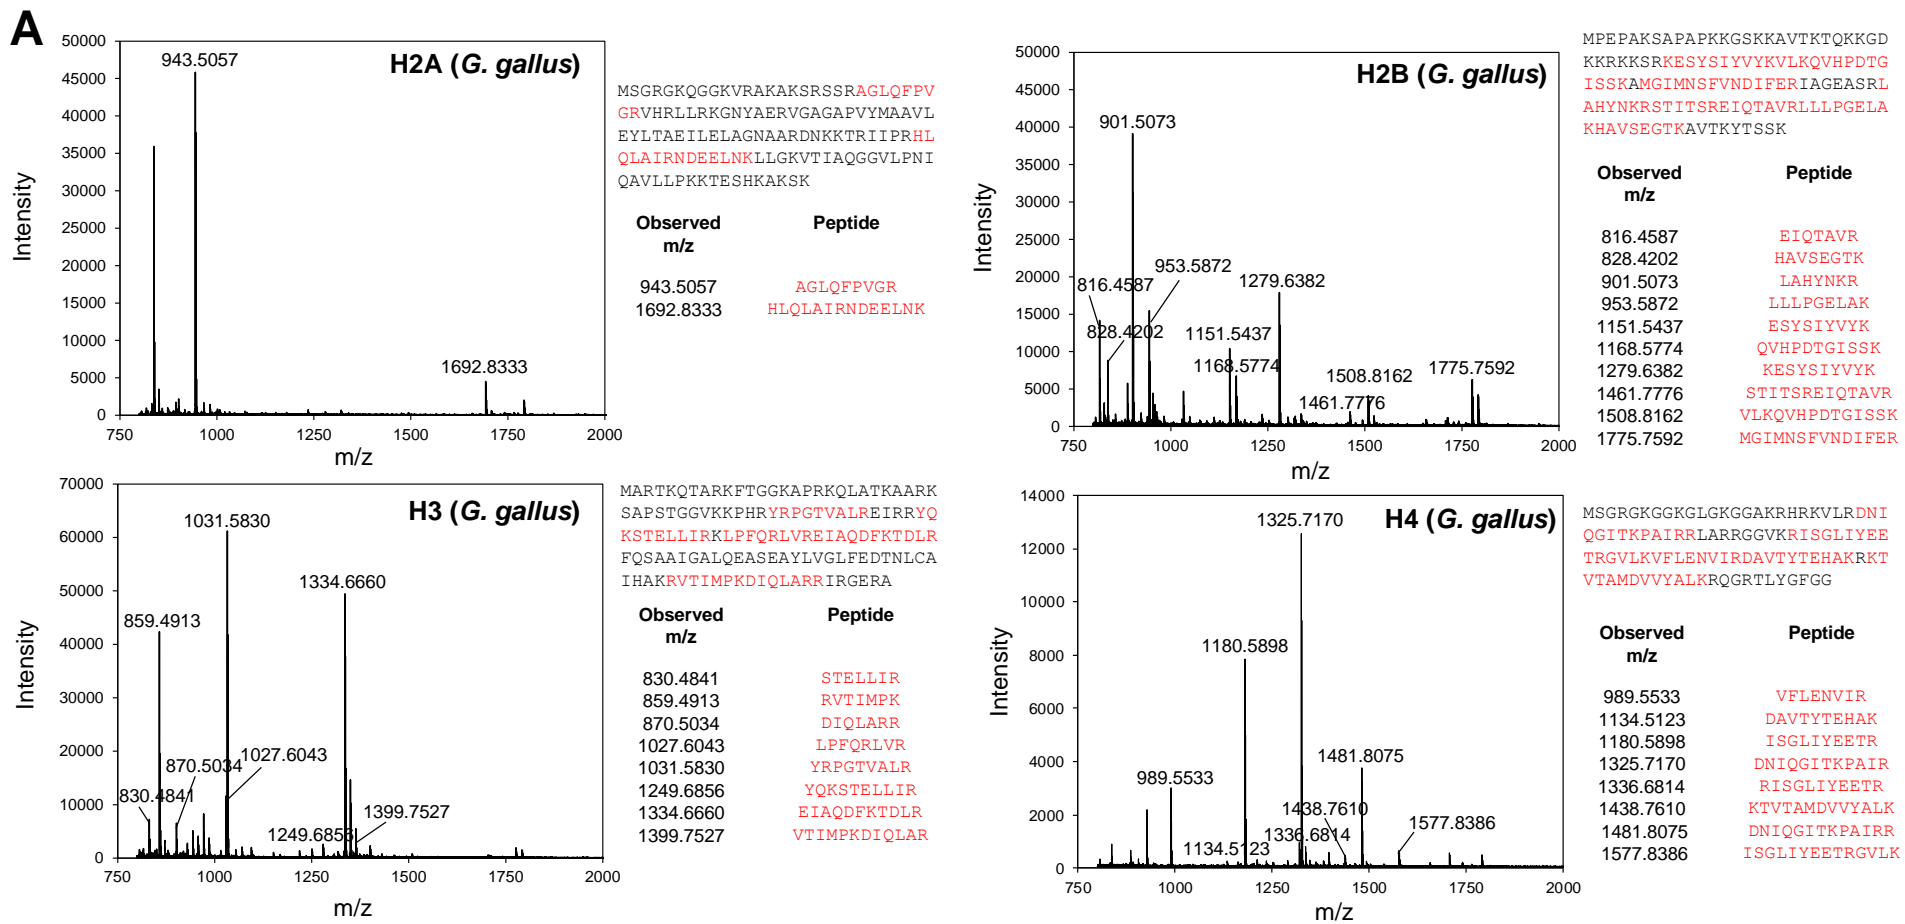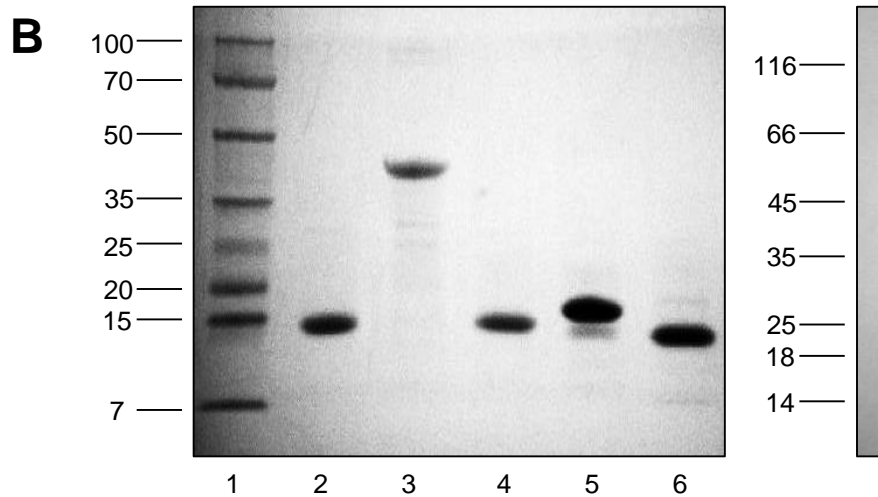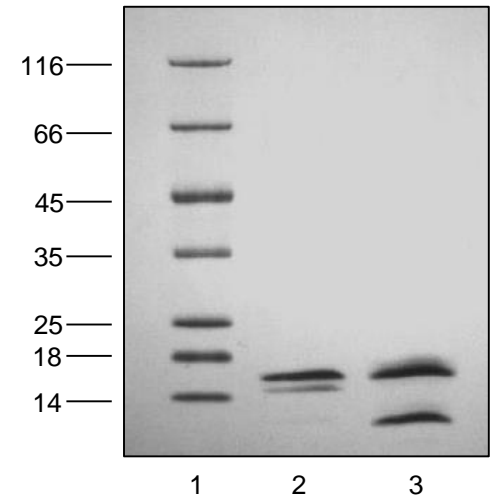

**Fig. S3**

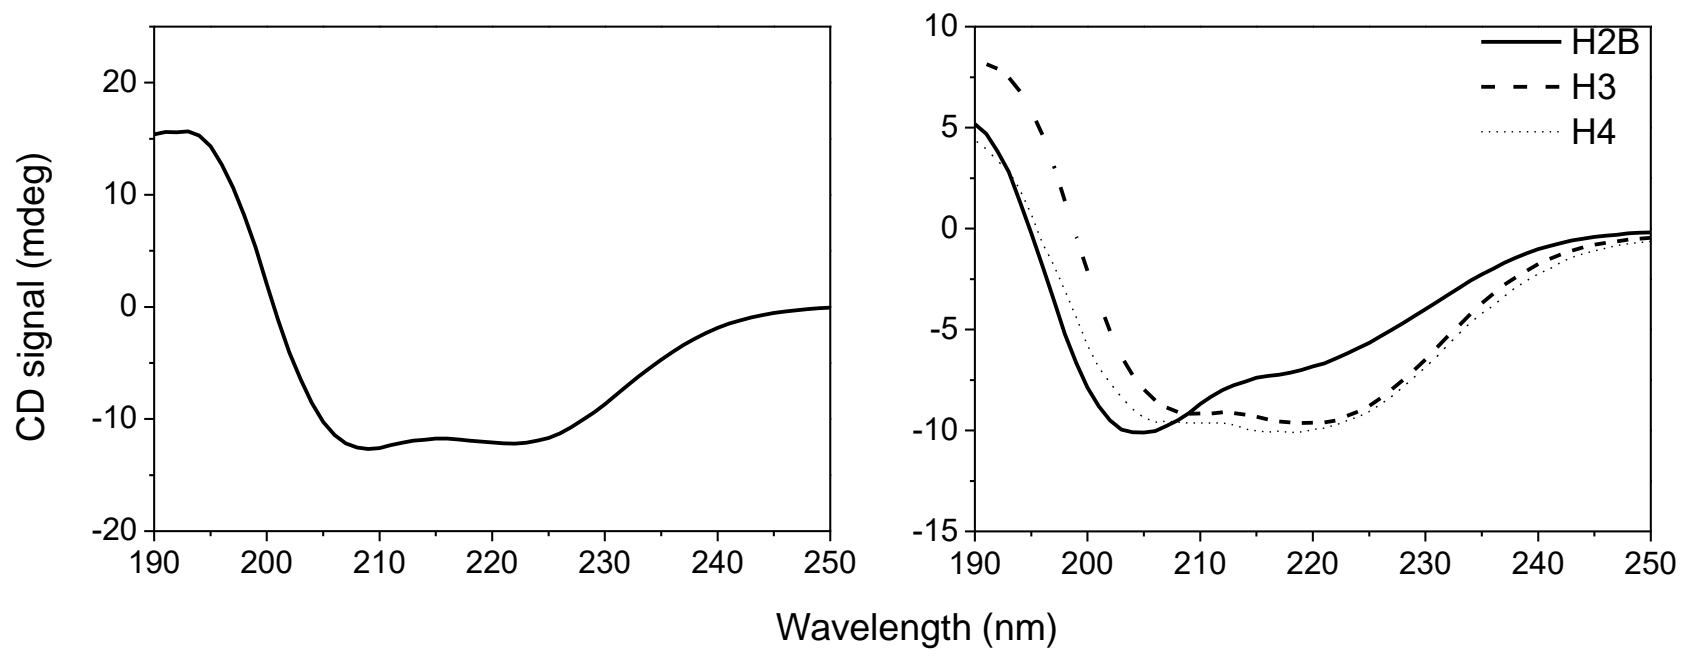

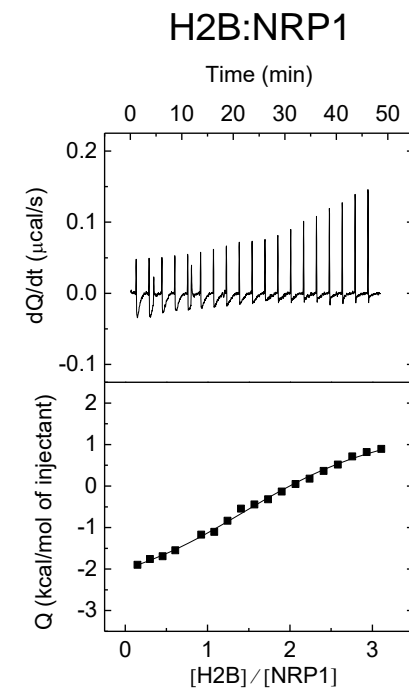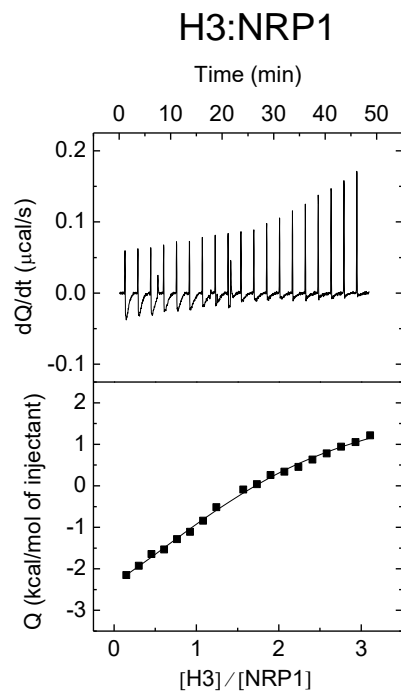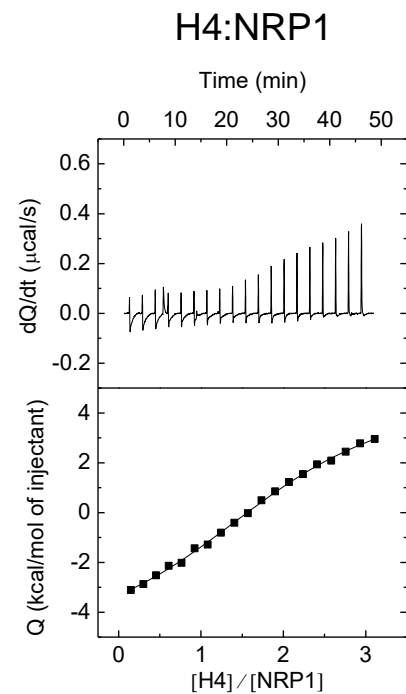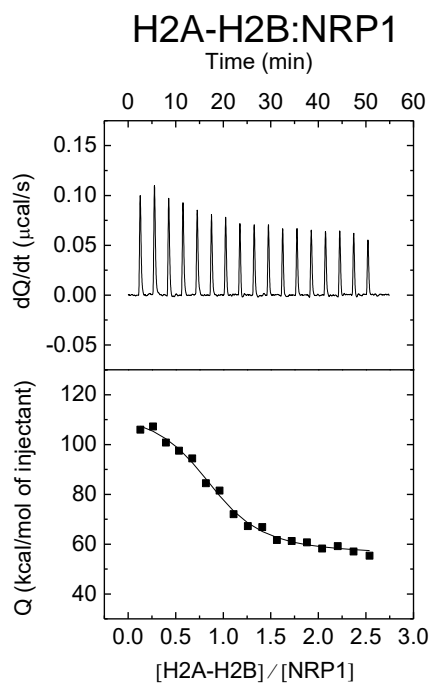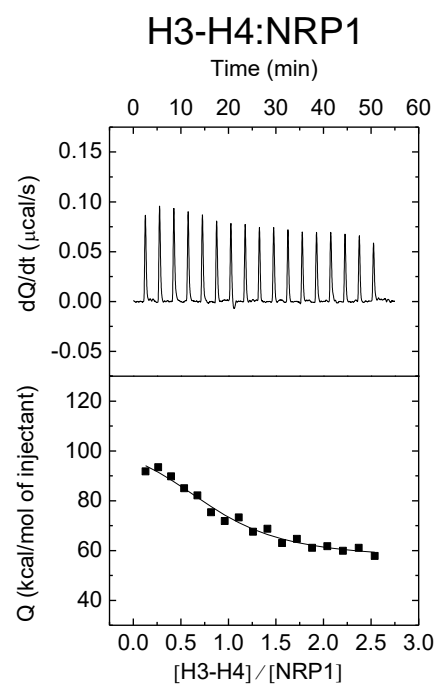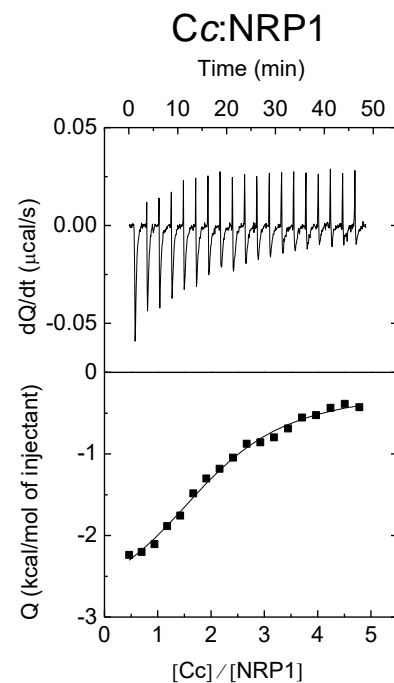



**Fig. S6**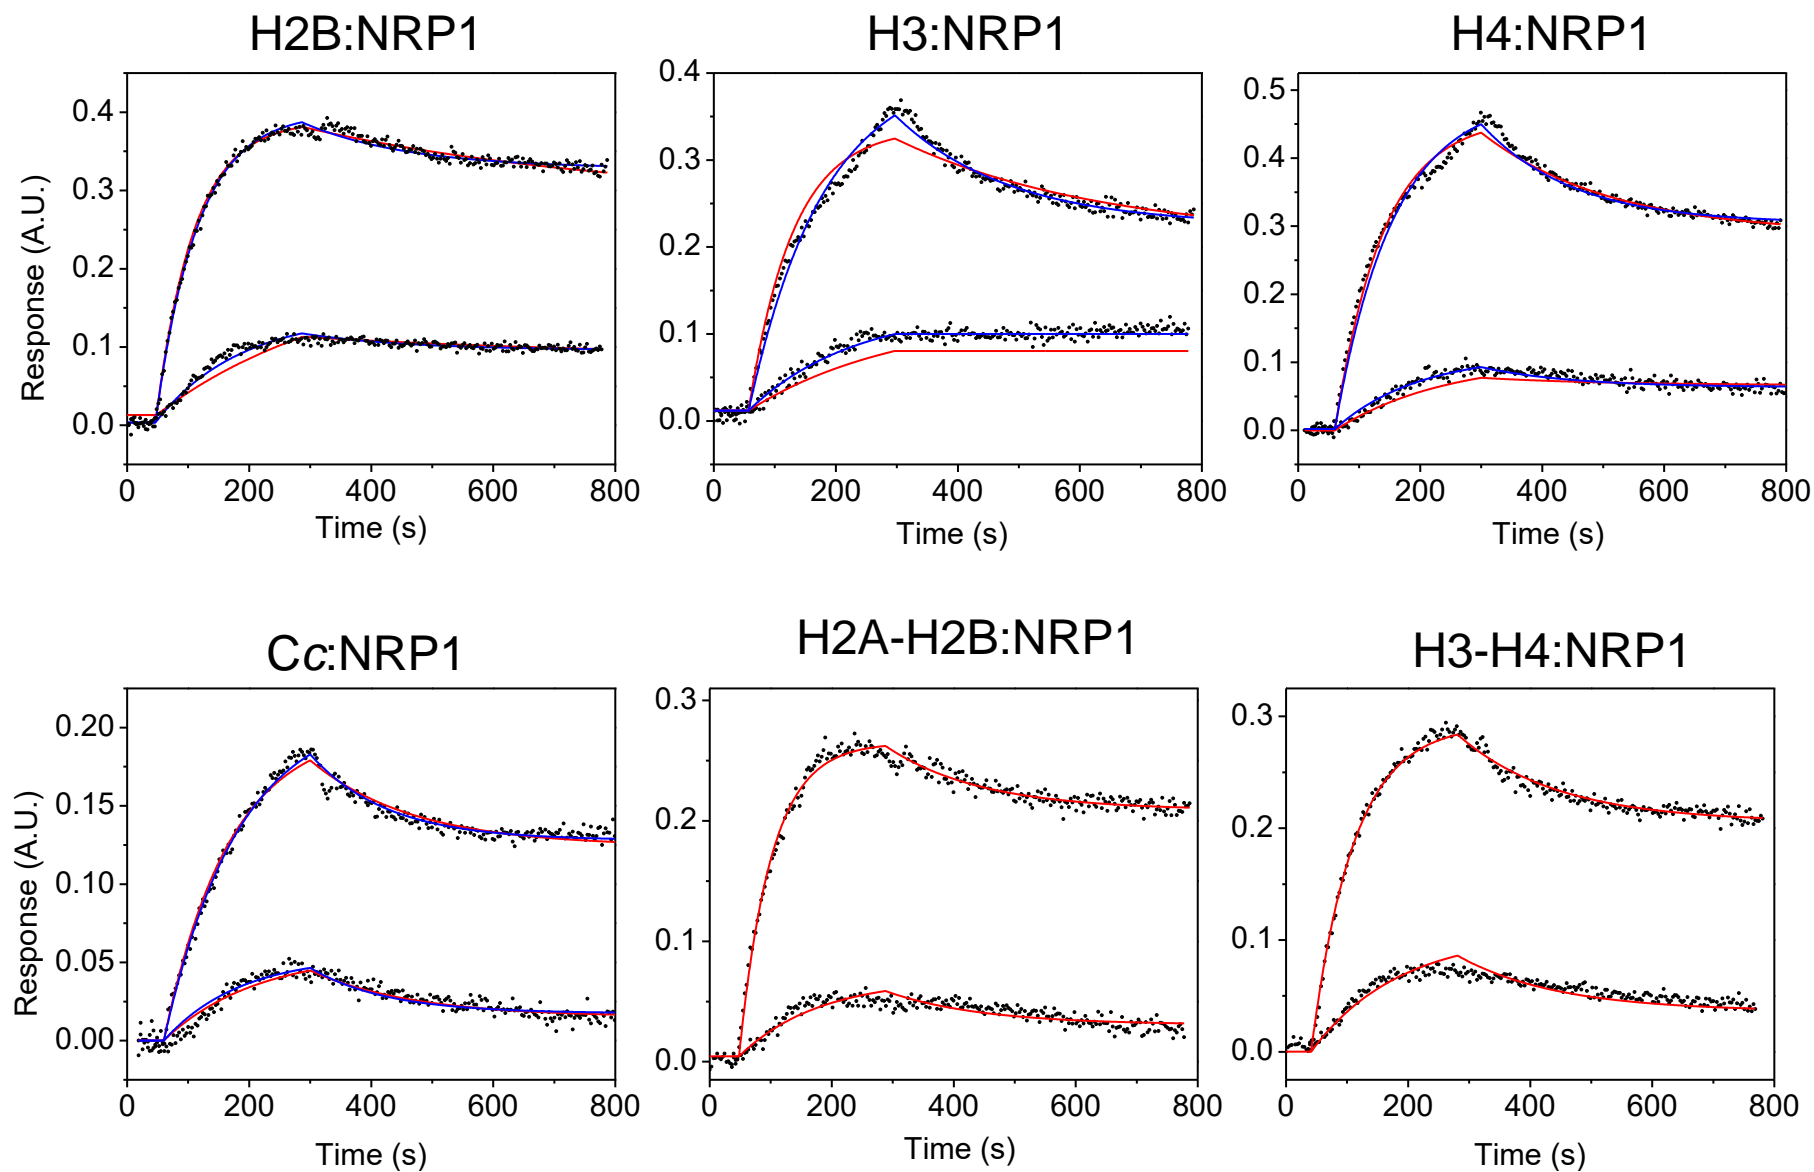

|     |                             |                                                                 |     |
|-----|-----------------------------|-----------------------------------------------------------------|-----|
| H2A | <i>Xenopus laevis</i>       | MSGRGKGGKTRAKAKTTRSSRAGLQFPVGRVHRLLRKGNYAERVGAGAPVYLAAVLEYLIT   | 60  |
|     | <i>Arabidopsis thaliana</i> | MSGRGKGGKAKTKGKSRSSRAGLQFPVGRVHRLLRKGNYAERVGAGAPVYLAAVMEYLA     | 59  |
|     | <i>Xenopus laevis</i>       | AETLELAGNAARDNKKTRII PRHLQLAVRNDEELNKLKLGVTIAQGGVLPNIQSVLLPKK   | 120 |
|     | <i>Arabidopsis thaliana</i> | AEVLELAGNAARDNKKTRII PRHLQLAIRNDEELNKLKLSGVTIAQGGVLPNIQAVLLPKK  | 119 |
|     | <i>Xenopus laevis</i>       | TESAKSAKSK----- 130                                             |     |
|     | <i>Arabidopsis thaliana</i> | TSA PVTSSAPKSGKSSSQSQEY 141                                     |     |
| H2B | <i>Xenopus laevis</i>       | -----MPEP-AKSAPAPKKGSKKAVTKT-QKKGKRRKSRKESYAI                   | 40  |
|     | <i>Arabidopsis thaliana</i> | MAKADKKPAEKKPAEKTAAEPAAAAEKKPKAGKKLPKEPAGAGDKKRRSKKNVE TYKI     | 60  |
|     | <i>Xenopus laevis</i>       | YVYKVLKQVHPDTGISSKAMSIMNSFVNDVFERIAGEASRLAHYNKRSTIITSREIQTAVR   | 100 |
|     | <i>Arabidopsis thaliana</i> | YIFKVLKQVHPDIDGISSKAMGIMNSFINDIFEKLAGESSKRLARYNKKPTIITSREIQTAVR | 120 |
|     | <i>Xenopus laevis</i>       | LLLPGELAKHAVSEGTKAVTKYTSAK 126                                  |     |
|     | <i>Arabidopsis thaliana</i> | LVLPGELAKHAVSEGTKAVTKETSS- 145                                  |     |
| H3  | <i>Xenopus laevis</i>       | MARTKQTARKSTGGKAPRKQLVTKAAKCAPATGGVKKPHRYRPGTVALREIRRYQKSTE     | 60  |
|     | <i>Arabidopsis thaliana</i> | MARTKQTARKSTGGKAPRKQLATKAARKSAPITGGVKKPHRYRPGTVALREIRRYQKSTE    | 60  |
|     | <i>Xenopus laevis</i>       | LLIRKLPFQRLVREIAQDFKTDLRFQRSAVMALQEASEAYLVALFEDTNLCAIHAKRVTI    | 120 |
|     | <i>Arabidopsis thaliana</i> | LLIRKLPFQRLVREIAQDFKTDLRFQSHAVLALQEAAEAYLVGLFEDTNLCAIHAKRVTI    | 120 |
|     | <i>Xenopus laevis</i>       | MPKDIQLARRIGERA 136                                             |     |
|     | <i>Arabidopsis thaliana</i> | MPKDIQLARRIGERA 136                                             |     |
| H4  | <i>Xenopus laevis</i>       | MSGRGKGGKGLGKGGAKRHRKVLDRDNIQGITKPAIRRLARRGGVKRISGLIYEETRGLVK   | 60  |
|     | <i>Arabidopsis thaliana</i> | MSGRGKGGKGLGKGGAKRHRKVLDRDNIQGITKPAIRRLARRGGVKRISGLIYEETRGLVK   | 60  |
|     | <i>Xenopus laevis</i>       | VFLENVIRDAVITYTEHAKRKTVTAMDVVYALKRQRTLYGFGG 103                 |     |
|     | <i>Arabidopsis thaliana</i> | VFLENVIRDAVITYTEHAKRKTVTAMDVVYALKRQRTLYGFGG 103                 |     |

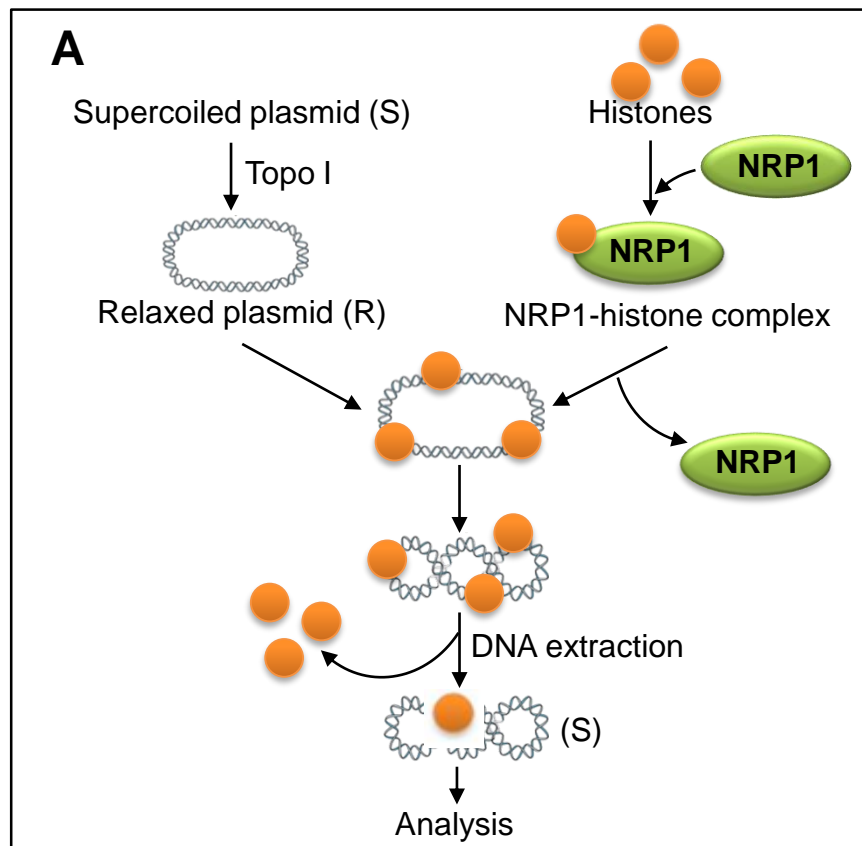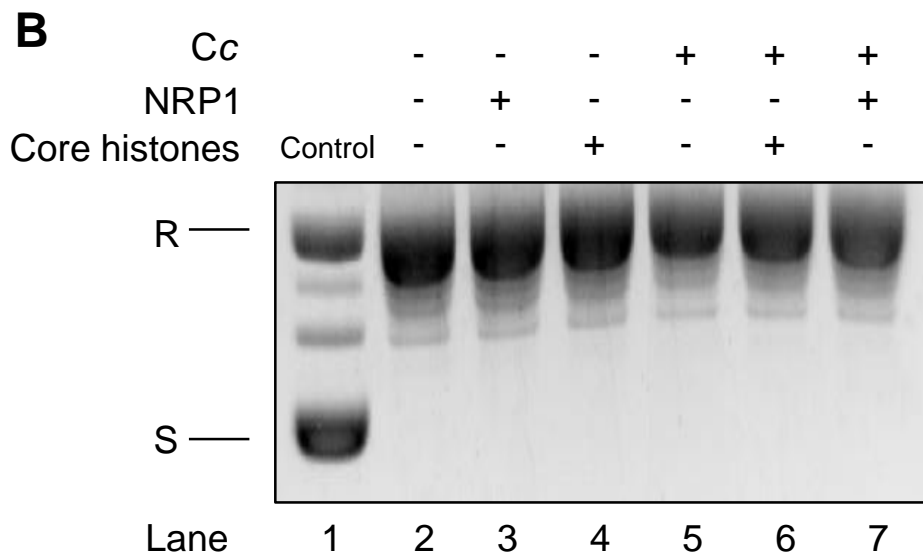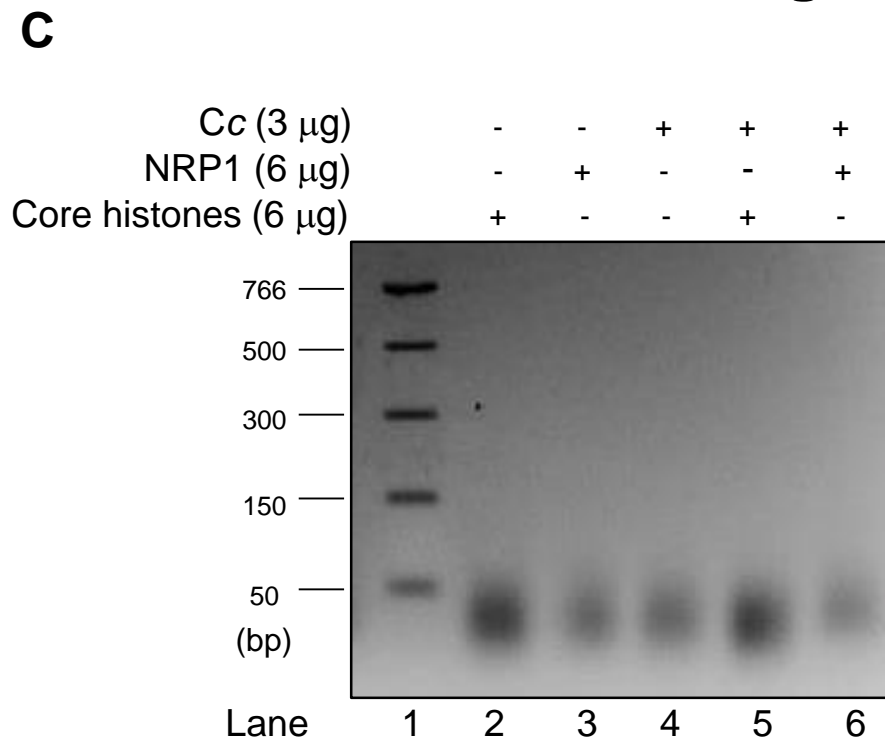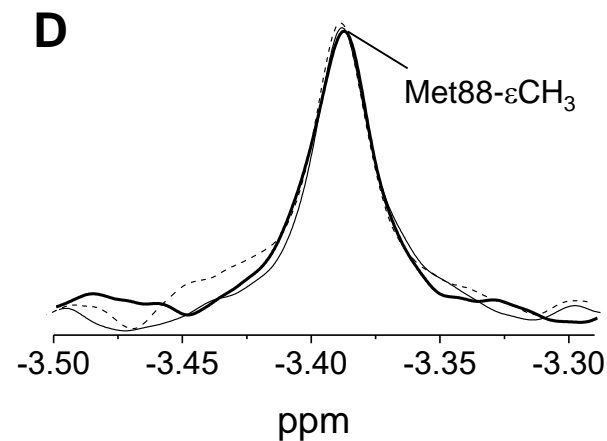

**H2A:NRP1**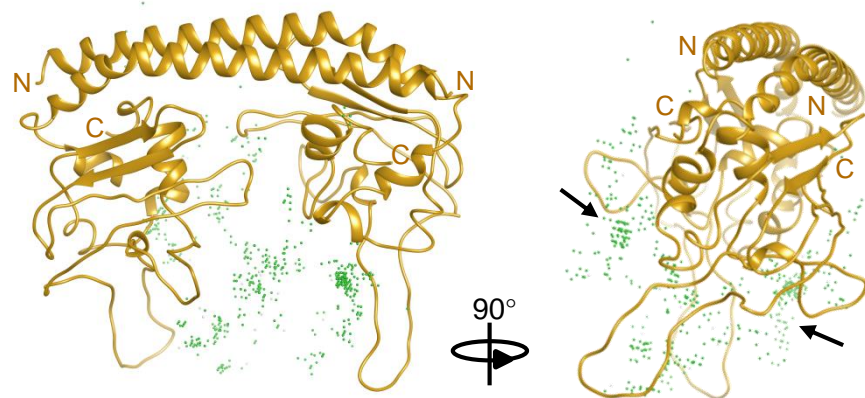**H2B:NRP1**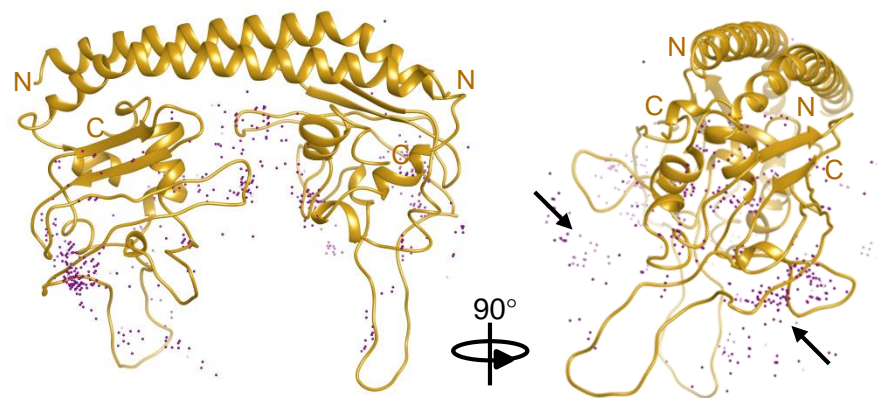**H3:NRP1**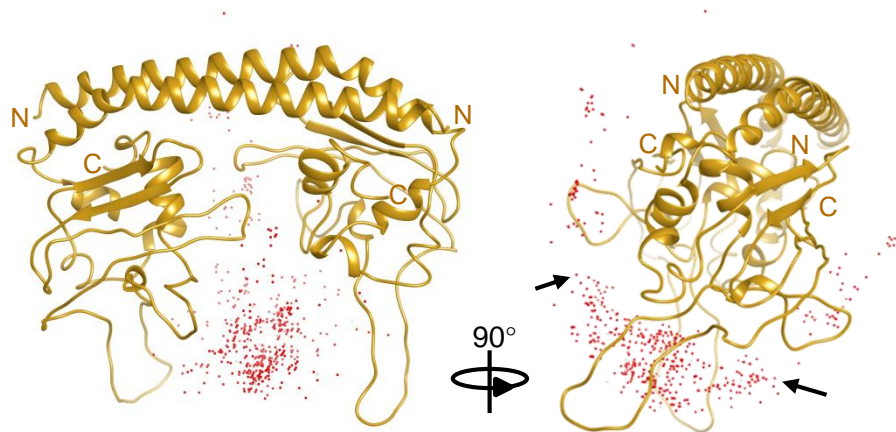**H4:NRP1**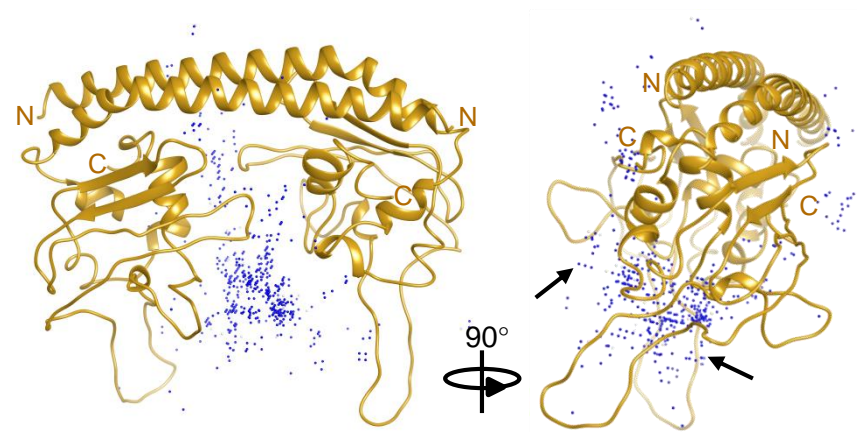

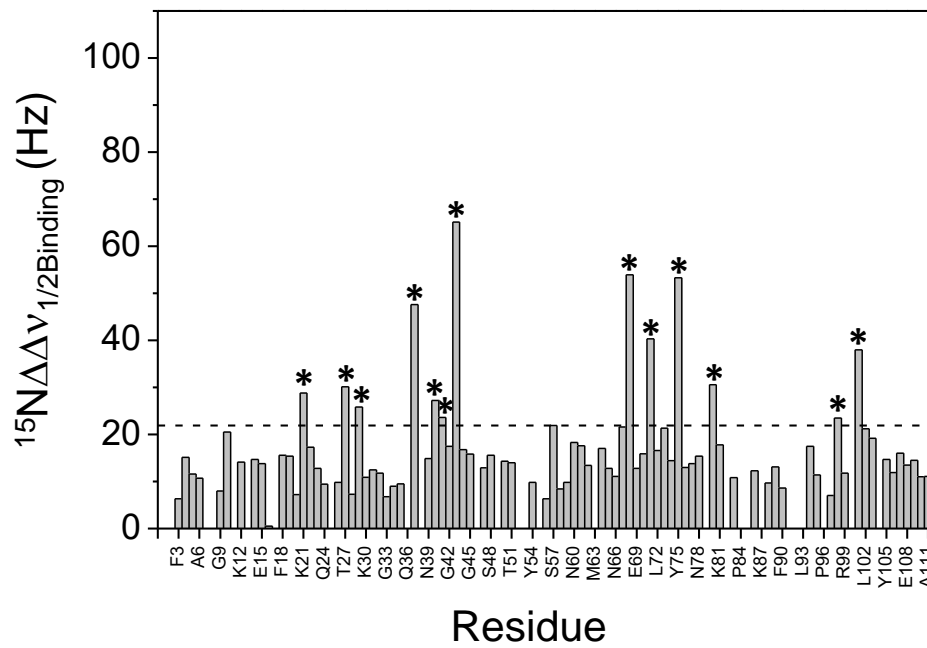

A

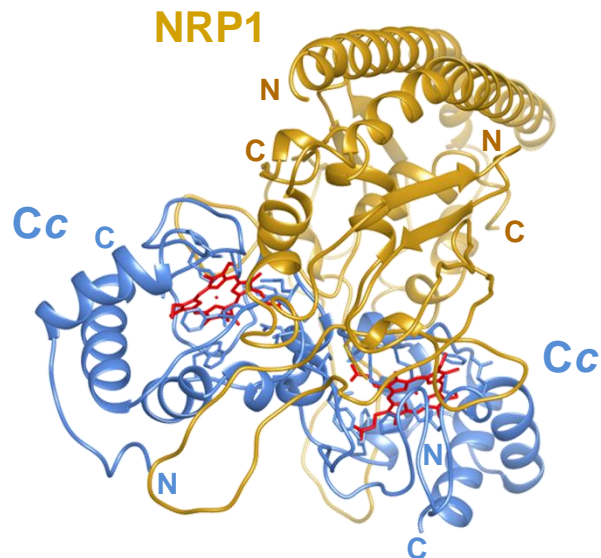

B

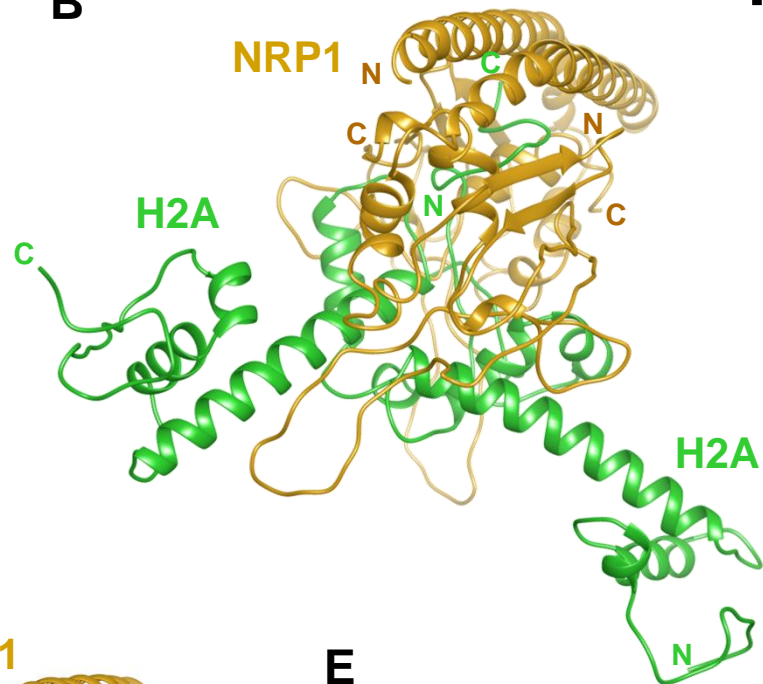

C

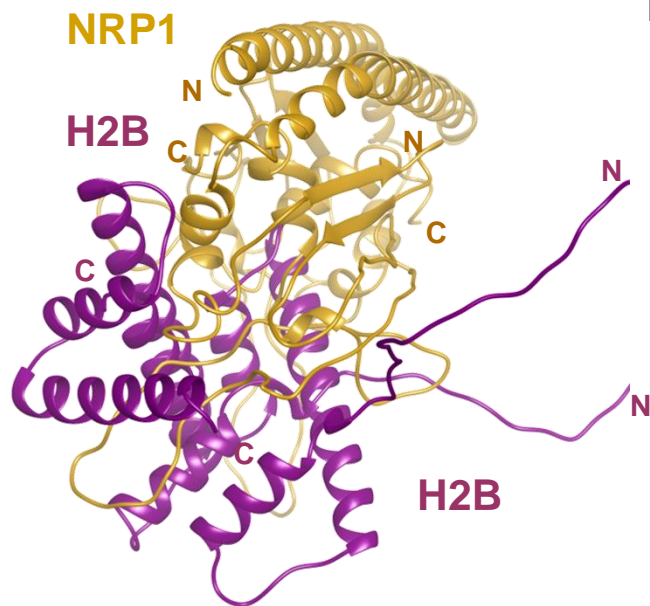

D

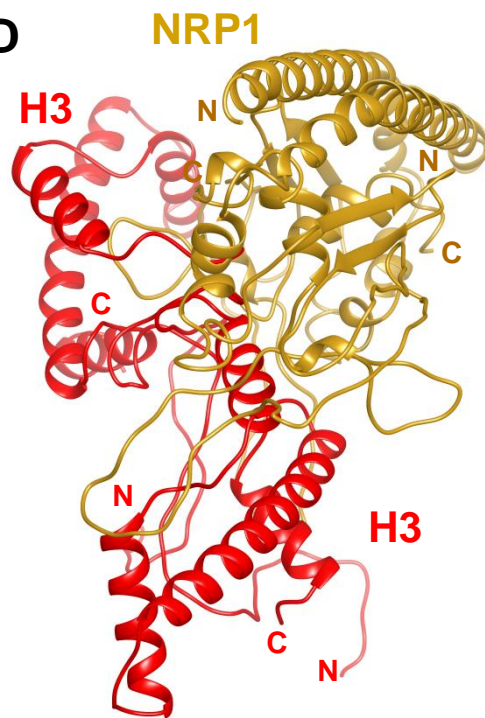

E

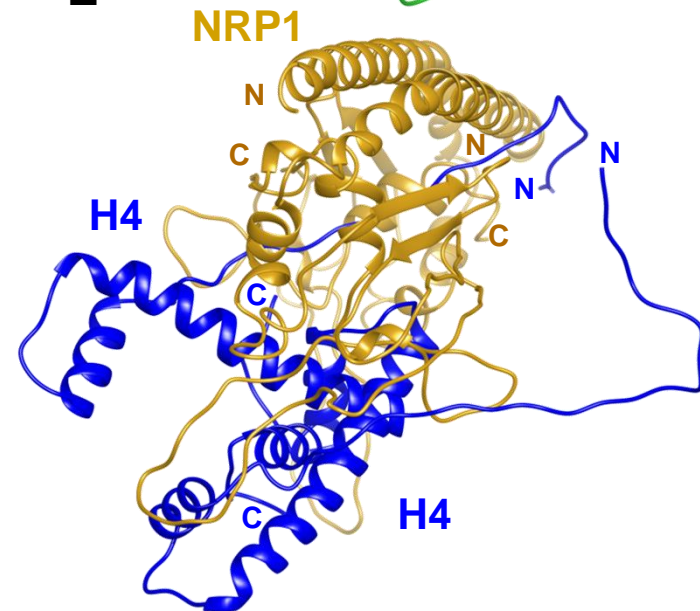

Supplement: gkw1215_Supp.pdf [file gkw1215_Supp.pdf]
